# Supplementary material
Source: PubMed Central journal article supplement (PMC8286987)
Supplement: 520_2021_6419_MOESM1_ESM.pdf [file 520_2021_6419_MOESM1_ESM.pdf]

|                                                                                               | Strongly disagree<br> | Disagree<br> | No opinion<br>+/- | Agree<br> | Strongly Agree<br> |
|-----------------------------------------------------------------------------------------------|--------------------------------------------------------------------------------------------------------|-----------------------------------------------------------------------------------------------|-------------------|----------------------------------------------------------------------------------------------|-------------------------------------------------------------------------------------------------------|
| Covid-19 is less serious than cancer                                                          |                                                                                                        |                                                                                               |                   |                                                                                              |                                                                                                       |
| Covid-19 is more serious in patients with cancer                                              |                                                                                                        |                                                                                               |                   |                                                                                              |                                                                                                       |
| Covid-19 impacted the management of my cancer                                                 |                                                                                                        |                                                                                               |                   |                                                                                              |                                                                                                       |
| Vaccine may interfere with the efficacy of the chemotherapy                                   |                                                                                                        |                                                                                               |                   |                                                                                              |                                                                                                       |
| Vaccine could affect the course of cancer disease                                             |                                                                                                        |                                                                                               |                   |                                                                                              |                                                                                                       |
| I have confidence in the health care system                                                   |                                                                                                        |                                                                                               |                   |                                                                                              |                                                                                                       |
| I have confidence in my doctor                                                                |                                                                                                        |                                                                                               |                   |                                                                                              |                                                                                                       |
| Vaccine is unnecessary since Covid-19 is a harmless disease                                   |                                                                                                        |                                                                                               |                   |                                                                                              |                                                                                                       |
| I will be taking any type of vaccine offered by the authorities                               |                                                                                                        |                                                                                               |                   |                                                                                              |                                                                                                       |
| The vaccine is safe                                                                           |                                                                                                        |                                                                                               |                   |                                                                                              |                                                                                                       |
| Getting infected by Covid-19 gives better immunity than the vaccine                           |                                                                                                        |                                                                                               |                   |                                                                                              |                                                                                                       |
| Vaccine is effective at preventing Covid-19 contamination                                     |                                                                                                        |                                                                                               |                   |                                                                                              |                                                                                                       |
| I have priority to receive the vaccine because I have a chronic disease                       |                                                                                                        |                                                                                               |                   |                                                                                              |                                                                                                       |
| I prefer to receive the vaccine after the others to ensure that there are no problems with it |                                                                                                        |                                                                                               |                   |                                                                                              |                                                                                                       |
| The vaccine is an artificial product that will interfere with my DNA                          |                                                                                                        |                                                                                               |                   |                                                                                              |                                                                                                       |
| Vaccine contains dangerous ingredients                                                        |                                                                                                        |                                                                                               |                   |                                                                                              |                                                                                                       |
| Vaccine is critical to fight covid-19 pandemic                                                |                                                                                                        |                                                                                               |                   |                                                                                              |                                                                                                       |
| Since I have the right to give my consent for any treatment, vaccination should be voluntary  |                                                                                                        |                                                                                               |                   |                                                                                              |                                                                                                       |
| To protect public health we should follow government guidelines about the vaccine             |                                                                                                        |                                                                                               |                   |                                                                                              |                                                                                                       |
| It is legitimate for government to mandate vaccination                                        |                                                                                                        |                                                                                               |                   |                                                                                              |                                                                                                       |
